# Supplementary material for: Structure of saligenin: microwave, UV and IR spectroscopy studies in a supersonic jet combined with quantum chemistry calculations
Source: Royal Society of Chemistry journal article supplement (doi:10.1039/c4cp01693a), 2014-06-27
Supplement: c4cp01693a1.pdf [file c4cp01693a1.pdf]

## Supplementary Information

### **Structure of saligenin: Microwave, UV and IR spectroscopy studies in a supersonic jet combined with quantum chemistry calculations**

Sumit Kumar<sup>a</sup>, Santosh K. Singh<sup>a</sup>, Camilla Calabrese<sup>b</sup>, Assimo Maris<sup>b</sup>, Sonia Melandri<sup>b\*</sup> and Alope Das<sup>a\*</sup>

<sup>a</sup>Department of Chemistry, Dr. Homi Bhabha Road, Pashan, Pune-411008, India

<sup>b</sup>Dipartimento di Chimica "G. Ciamician" dell'Università, Via Selmi 2, I-40126 Bologna, Italy

---

\*Corresponding authors. Phone: 91-20-2590-8078; Fax: 91-20-2586-5315; E-mail: [a.das@iiserpune.ac.in](mailto:a.das@iiserpune.ac.in), [aloke.das73@gmail.com](mailto:aloke.das73@gmail.com)

Phone:+39 051 2099502; Fax: +39 051 2099456; Email: [sonia.melandri@unibo.it](mailto:sonia.melandri@unibo.it)

## Contents

**Figure S1:** Optimized structures of (a) water, (b) methanol, (c) phenol, (d) phenol...water complex, and (e) phenol...methanol complex obtained at the M05-2X/aug-cc-pVTZ level of theory.

**Table S1:** Theoretical OH stretch frequencies ( $\nu_{OH}^{benzylic}$  and  $\nu_{OH}^{phenolic}$ ) of SA1, SA2, and SA3 conformers of saligenin calculated using different basis sets at the M05-2X level of theory. Scaling of the calculated harmonic frequencies has been done with respect to experimental frequency of phenol OH stretch, gauche benzyl alcohol (BA1) O-H stretch, phenolic as well as benzylic O-H stretch of saligenin (SA1) and water O-H stretch.

**Table S2.** Experimental rotational frequencies (MHz) of saligenin and its deuterated hydroxyl substituted species.

(a)

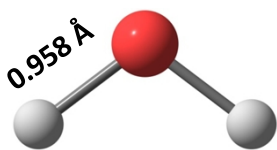

(b)

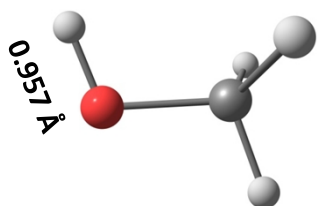

(c)

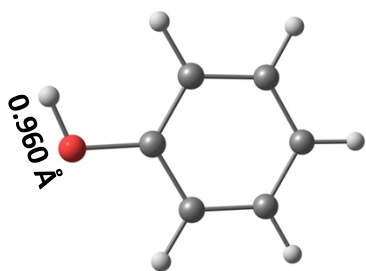

(d)

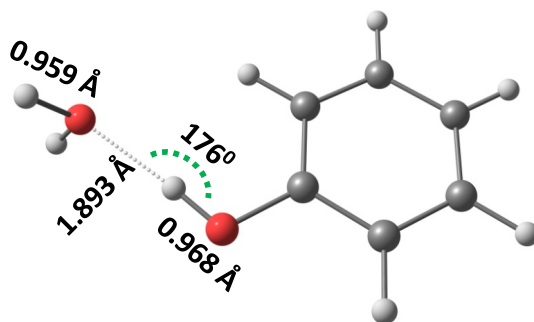

(e)

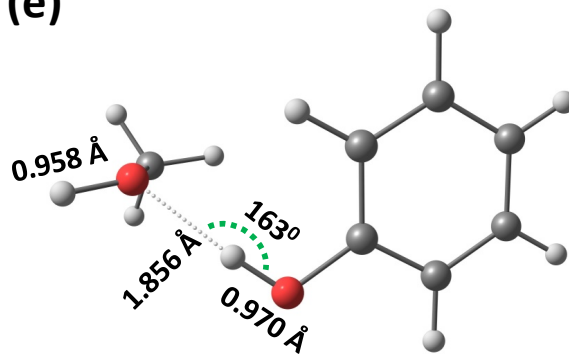

**Figure S1:** Optimized structures of (a) water (b) methanol (c) phenol (d) phenol...water complex and (e) phenol...methanol complex obtained at the M05-2X/aug-cc-pVTZ level of theory.

**Table S1:** Theoretical OH stretch frequencies ( $\nu_{OH}^{benzylic}$  and  $\nu_{OH}^{phenolic}$ ) of SA1, SA2, and SA3 conformers of saligenin calculated using different basis sets at the M05-2X level of theory. Scaling of the calculated harmonic frequencies has been done with respect to experimental frequency of phenol OH stretch, gauche benzyl alcohol (BA1) O-H stretch, phenolic as well as benzylic O-H stretch of saligenin (SA1) and water O-H stretch

Scaling factor has been obtained by taking the ratio of experimental and calculated frequencies. <sup>a</sup>Experimental OH stretch frequency of phenol,  $\nu_{OH}$  (phenol): 3657 cm<sup>-1</sup> (Ref.

| Scaling with respect to $\nu_{OH}$ (phenol) <sup>a</sup>         |                |                                           |      |      |                                           |      |      |
|------------------------------------------------------------------|----------------|-------------------------------------------|------|------|-------------------------------------------|------|------|
| Theory                                                           | Scaling factor | $\nu_{OH}^{benzylic}$ (cm <sup>-1</sup> ) |      |      | $\nu_{OH}^{phenolic}$ (cm <sup>-1</sup> ) |      |      |
|                                                                  |                | SA1                                       | SA2  | SA3  | SA1                                       | SA2  | SA3  |
| M05-2X/cc-pVTZ                                                   | 0.9424         | 3638                                      | 3492 | 3641 | 3492                                      | 3493 | 3657 |
| M05-2X/cc-pVQZ                                                   | 0.9393         | 3632                                      | 3490 | 3634 | 3490                                      | 3492 | 3651 |
| M05-2X/aug-cc-pVDZ                                               | 0.9393         | 3636                                      | 3498 | 3642 | 3498                                      | 3500 | 3659 |
| M05-2X/aug-cc-pVTZ                                               | 0.9440         | 3638                                      | 3499 | 3641 | 3499                                      | 3500 | 3658 |
| Scaling with respect to $\nu_{OH}$ (BA1) <sup>b</sup>            |                |                                           |      |      |                                           |      |      |
| M05-2X/cc-pVTZ                                                   | 0.9431         | 3641                                      | 3495 | 3644 | 3663                                      | 3495 | 3660 |
| M05-2X/cc-pVQZ                                                   | 0.9414         | 3640                                      | 3498 | 3643 | 3662                                      | 3499 | 3659 |
| M05-2X/aug-cc-pVDZ                                               | 0.9401         | 3639                                      | 3501 | 3645 | 3662                                      | 3503 | 3662 |
| M05-2X/aug-cc-pVTZ                                               | 0.9443         | 3639                                      | 3500 | 3642 | 3661                                      | 3500 | 3659 |
| Scaling with respect to $\nu_{OH}^{benzylic}$ (SA1) <sup>c</sup> |                |                                           |      |      |                                           |      |      |
| M05-2X/cc-pVTZ                                                   | 0.9418         | 3636                                      | 3658 | 3639 | 3490                                      | 3490 | 3659 |
| M05-2X/cc-pVQZ                                                   | 0.9403         | 3636                                      | 3658 | 3638 | 3494                                      | 3495 | 3655 |
| M05-2X/aug-cc-pVDZ                                               | 0.9394         | 3636                                      | 3659 | 3643 | 3499                                      | 3500 | 3654 |
| M05-2X/aug-cc-pVTZ                                               | 0.9435         | 3636                                      | 3658 | 3639 | 3497                                      | 3497 | 3652 |
| Scaling with respect to $\nu_{OH}^{phenolic}$ (SA1) <sup>c</sup> |                |                                           |      |      |                                           |      |      |
| M05-2X/cc-pVTZ                                                   | 0.9430         | 3640                                      | 3662 | 3643 | 3494                                      | 3495 | 3659 |
| M05-2X/cc-pVQZ                                                   | 0.9403         | 3636                                      | 3658 | 3638 | 3494                                      | 3495 | 3655 |
| M05-2X/aug-cc-pVDZ                                               | 0.9381         | 3631                                      | 3654 | 3638 | 3494                                      | 3496 | 3654 |
| M05-2X/aug-cc-pVTZ                                               | 0.9426         | 3633                                      | 3654 | 3636 | 3494                                      | 3494 | 3652 |

35); <sup>b</sup>Experimental OH stretch frequency of gauche benzyl alcohol,  $\nu_{OH}$  (BA1): 3657 cm<sup>-1</sup> (Ref. 10); <sup>c</sup>Experimental stretch frequencies of benzylic and phenolic OH groups of saligenin, respectively,  $\nu_{OH}^{benzylic}$  (SA1): 3636 cm<sup>-1</sup>,  $\nu_{OH}^{phenolic}$  (SA1): 3494 cm<sup>-1</sup> (This work).

**Table S2.** Experimental rotational frequencies (MHz) of saligenin and its hydroxyl deuterated species

| J''(K'' <sub>a</sub> ,K'' <sub>c</sub> )-J'(K' <sub>a</sub> ,K' <sub>c</sub> ) | Saligenin |          | Saligenin-CH2OD-OH |          | Saligenin-CH2OH-OD |          | Saligenin-CH2OD-OD |          |
|--------------------------------------------------------------------------------|-----------|----------|--------------------|----------|--------------------|----------|--------------------|----------|
|                                                                                | Exp       | Exp-calc | Exp                | Exp-calc | Exp                | Exp-calc | Exp                | Exp-calc |
| 18( 5,14)- 17( 4,14)                                                           | 64835.69  | -0.01975 |                    |          |                    |          |                    |          |
| 17( 5,12)- 16( 4,13)                                                           | 71071.83  | -0.00056 |                    |          |                    |          |                    |          |
| 16( 5,11)- 15( 4,12)                                                           | 64811.45  | -0.00973 |                    |          |                    |          |                    |          |
| 14( 4,10)- 13( 3,11)                                                           | 60150.15  | 0.02035  |                    |          |                    |          |                    |          |
| 16( 6,10)- 15( 5,11)                                                           | 60520.17  | 0.0221   |                    |          |                    |          |                    |          |
| 17( 6,11)- 16( 5,12)                                                           | 64710.34  | -0.01818 |                    |          |                    |          |                    |          |
| 18( 6,12)- 17( 5,13)                                                           | 69654.03  | 0.00171  |                    |          |                    |          |                    |          |
| 18( 6,13)- 17( 5,13)                                                           | 64839.4   | -0.00712 |                    |          |                    |          |                    |          |
| 25( 6,20)- 24( 5,19)                                                           | 60605     | -0.00358 |                    |          |                    |          |                    |          |
| 16( 7,10)- 15( 6, 9)                                                           | 60837.31  | -0.00543 |                    |          |                    |          |                    |          |
| 16( 7, 9)- 15( 6,10)                                                           | 61875.83  | 0.0027   |                    |          |                    |          |                    |          |
| 16( 7,10)- 15( 6,10)                                                           | 61687.09  | -0.00525 |                    |          |                    |          |                    |          |
| 16( 7, 9)- 15( 6, 9)                                                           | 61026.01  | -0.03748 |                    |          |                    |          |                    |          |
| 17( 7,10)- 16( 6,11)                                                           | 64567.69  | -0.01527 |                    |          |                    |          |                    |          |
| 17( 7,11)- 16( 6,10)                                                           | 62494.06  | -0.00968 |                    |          |                    |          |                    |          |
| 17( 7,10)- 16( 6,10)                                                           | 62913.84  | 0.02185  |                    |          |                    |          |                    |          |
| 17( 7,11)- 16( 6,11)                                                           | 64147.96  | 0.0032   |                    |          |                    |          |                    |          |
| 18( 7,12)- 17( 6,11)                                                           | 63749.89  | -0.00775 |                    |          |                    |          |                    |          |
| 18( 7,11)- 17( 6,12)                                                           | 67562.43  | 0.04124  |                    |          |                    |          |                    |          |
| 19( 7,13)- 18( 6,12)                                                           | 64554.75  | -0.00194 |                    |          |                    |          |                    |          |
| 19( 7,12)- 18( 6,13)                                                           | 71026.18  | 0.0052   |                    |          |                    |          |                    |          |
| 20( 7,14)- 19( 6,13)                                                           | 64940.35  | 0.04247  |                    |          |                    |          |                    |          |
| 21( 7,15)- 20( 6,14)                                                           | 65012.07  | -0.00182 |                    |          |                    |          |                    |          |
| 22( 7,16)- 21( 6,15)                                                           | 64920.52  | 0.02885  |                    |          |                    |          |                    |          |
| 23( 7,17)- 22( 6,16)                                                           | 64837.38  | -0.01705 |                    |          |                    |          |                    |          |
| 24( 7,18)- 23( 6,17)                                                           | 64934.46  | -0.02743 |                    |          |                    |          |                    |          |
| 14( 8, 7)- 13( 7, 6)                                                           | 60500.56  | 0.01447  |                    |          | 59901.00           | -0.03446 |                    |          |
| 14( 8, 6)- 13( 7, 7)                                                           | 60512.34  | 0.01664  |                    |          | 59913.02           | -0.05584 |                    |          |
| 14( 8, 7)- 13( 7, 7)                                                           | 60510.89  | -0.01048 |                    |          |                    |          |                    |          |
| 14( 8, 6)- 13( 7, 6)                                                           | 60501.98  | 0.01159  |                    |          |                    |          |                    |          |
| 15( 8, 8)- 14( 7, 7)                                                           | 62858.17  | -0.01256 |                    |          |                    |          |                    |          |
| 15( 8, 7)- 14( 7, 8)                                                           | 62892.64  | 0.00164  |                    |          |                    |          |                    |          |
| 15( 8, 7)- 14( 7, 7)                                                           | 62862.72  | -0.00297 |                    |          |                    |          |                    |          |
| 15( 8, 8)- 14( 7, 8)                                                           | 62888.08  | -0.01796 |                    |          |                    |          |                    |          |
| 16( 8, 9)- 15( 7, 8)                                                           | 65172.66  | 0.02192  |                    |          |                    |          |                    |          |
| 16( 8, 8)- 15( 7, 9)                                                           | 65264.19  | -0.02074 |                    |          |                    |          |                    |          |
| 16( 8, 8)- 15( 7, 8)                                                           | 65185.78  | 0.00361  |                    |          |                    |          |                    |          |
| 16( 8, 9)- 15( 7, 9)                                                           | 65251.00  | -0.07243 |                    |          |                    |          |                    |          |
| 17( 8,10)- 16( 7, 9)                                                           | 67415.08  | -0.00082 |                    |          |                    |          |                    |          |
| 17( 8, 9)- 16( 7,10)                                                           | 67638.75  | 0.02174  |                    |          |                    |          |                    |          |

|                      |          |          |          |          |          |          |          |          |
|----------------------|----------|----------|----------|----------|----------|----------|----------|----------|
| 17( 8, 9)- 16( 7, 9) | 67449.98 | -0.01622 |          |          |          |          |          |          |
| 17( 8,10)- 16( 7,10) | 67603.76 | -0.05287 |          |          |          |          |          |          |
| 18( 8,10)- 17( 7,11) | 70042.43 | 0.01003  |          |          |          |          |          |          |
| 18( 8,11)- 17( 7,10) | 69536.67 | 0.00097  |          |          |          |          |          |          |
| 13( 9, 5)- 12( 8, 4) | 61696.96 | 0.04514  | 60879.16 | 0.08422  | 61081.8  | 0.06065  | 60272.34 | 0.05831  |
| 13( 9, 4)- 12( 8, 5) | 61696.96 | -0.06124 | 60879.16 | 0.00414  | 61081.8  | -0.04868 | 60272.34 | -0.02477 |
| 13( 9, 4)- 12( 8, 4) | 61696.96 | 0.03513  | 60879.16 | 0.07691  | 61081.8  | 0.05031  | 60272.34 | 0.05069  |
| 13( 9, 5)- 12( 8, 5) | 61696.96 | -0.05123 | 60879.16 | 0.01144  | 61081.8  | -0.03834 | 60272.34 | -0.01715 |
| 14( 9, 6)- 13( 8, 5) | 64106.95 | 0.04825  | 63248.19 | 0.19826  | 63469.35 | -0.00273 | 62620.19 | 0.18732  |
| 14( 9, 5)- 13( 8, 5) | 64106.95 | 0.00291  | 63248.19 | -0.13525 | 63469.35 | -0.04952 | 62620.19 | -0.15861 |
| 14( 9, 5)- 13( 8, 6) | 64107.36 | 0.01563  | 63248.19 | 0.16515  | 63469.73 | -0.07754 | 62620.19 | 0.15279  |
| 14( 9, 6)- 13( 8, 6) | 64107.36 | 0.06097  | 63248.19 | -0.10214 | 63469.73 | -0.03075 | 62620.19 | -0.12408 |
| 15( 9, 7)- 14( 8, 6) | 66506.24 | 0.00899  | 65607.2  | 0.02161  | 65846.37 | 0.06976  | 64957.95 | -0.01462 |
| 15( 9, 6)- 14( 8, 6) | 66506.4  | -0.00885 | 65607.2  | -0.10844 | 65846.37 | -0.11375 | 64958.12 | 0.01978  |
| 15( 9, 6)- 14( 8, 7) | 66507.83 | -0.00172 | 65608.37 | -0.0161  | 65847.94 | -0.0048  | 64959.20 | -0.01701 |
| 15( 9, 7)- 14( 8, 7) | 66507.83 | 0.17612  | 65608.37 | 0.11395  | 65847.94 | 0.17871  | 64959.20 | 0.11858  |
| 16( 9, 8)- 15( 8, 7) | 68890.94 | 0.00989  | 67953.14 | -0.00679 | 68208.6  | 0.01629  | 67282.60 | -0.04543 |
| 16( 9, 7)- 15( 8, 7) | 68891.53 | -0.02026 |          |          |          |          |          |          |
| 16( 9, 7)- 15( 8, 8) | 68896.10 | 0.00934  | 67957.04 | -0.00682 | 68213.87 | -0.01429 | 67286.71 | 0.02139  |
| 16( 9, 8)- 15( 8, 8) | 68895.47 | -0.00051 |          |          | 68213.29 | 0.04546  |          |          |
| 17( 9, 9)- 16( 8, 8) | 71255.15 | 0.02992  |          |          |          |          |          |          |
| 17( 9, 8)- 16( 8, 8) | 71257.09 | 0.01207  |          |          |          |          |          |          |
| 17( 9, 8)- 16( 8, 9) | 71270.20 | -0.01625 |          |          |          |          |          |          |
| 17( 9, 9)- 16( 8, 9) | 71268.25 | -0.0084  |          |          |          |          |          |          |
| 11(10, 2)- 10( 9, 1) | 60403.91 | -0.0123  | 59638.42 | -0.01481 | 59795.27 | -0.08489 |          |          |
| 11(10, 1)- 10( 9, 2) | 60403.91 | -0.01233 | 59638.42 | -0.01483 | 59795.27 | -0.08492 |          |          |
| 11(10, 1)- 10( 9, 1) | 60403.91 | -0.0123  | 59638.42 | -0.01481 | 59795.27 | -0.08489 |          |          |
| 11(10, 2)- 10( 9, 2) | 60403.91 | -0.01233 | 59638.42 | -0.01483 | 59795.27 | -0.08492 |          |          |
| 12(10, 3)- 11( 9, 2) | 62831.17 | -0.02222 | 62023.27 | 0.01002  | 62200.23 | -0.01299 | 61398.64 | -0.00074 |
| 12(10, 2)- 11( 9, 3) | 62831.17 | -0.02251 | 62023.27 | 0.00981  | 62200.23 | -0.01329 | 61398.64 | -0.00095 |
| 12(10, 2)- 11( 9, 2) | 62831.17 | -0.02224 | 62023.27 | 0.01001  | 62200.23 | -0.01301 | 61398.64 | -0.00075 |
| 12(10, 3)- 11( 9, 3) | 62831.17 | -0.02249 | 62023.27 | 0.00983  | 62200.23 | -0.01326 | 61398.64 | -0.00094 |
| 13(10, 4)- 12( 9, 3) | 65255.73 | -0.01722 | 64405.57 | -0.00604 | 64602.4  | -0.01891 | 63759.81 | 0.02407  |
| 13(10, 3)- 12( 9, 4) | 65255.73 | -0.01923 | 64405.57 | -0.0075  | 64602.4  | -0.02098 | 63759.81 | 0.02254  |
| 13(10, 3)- 12( 9, 3) | 65255.73 | -0.01738 | 64405.57 | -0.00616 | 64602.4  | -0.01908 | 63759.81 | 0.02394  |
| 13(10, 4)- 12( 9, 4) | 65255.73 | -0.01906 | 64405.57 | -0.00738 | 64602.4  | -0.02081 | 63759.81 | 0.02266  |
| 14(10, 5)- 13( 9, 4) | 67676.21 | 0.01893  | 66784.04 | -0.05693 | 67000.54 | 0.05277  | 66117.15 | 0.01882  |
| 14(10, 4)- 13( 9, 5) | 67676.21 | 0.00794  | 66784.04 | -0.06493 | 67000.54 | 0.04141  | 66117.15 | 0.01048  |
| 14(10, 4)- 13( 9, 4) | 67676.21 | 0.01795  | 66784.04 | -0.05763 | 67000.54 | 0.05175  | 66117.15 | 0.0181   |
| 14(10, 5)- 13( 9, 5) | 67676.21 | 0.00892  | 66784.04 | -0.06424 | 67000.54 | 0.04243  | 66117.15 | 0.01121  |
| 15(10, 6)- 14( 9, 5) | 70090.92 | 0.0354   | 69157.34 | 0.02205  | 69392.84 | 0.03104  | 68469.17 | 0.00147  |
| 15(10, 5)- 14( 9, 6) | 70090.92 | -0.01478 | 69157.34 | -0.01448 | 69392.84 | -0.02076 | 68469.17 | -0.03664 |
| 15(10, 5)- 14( 9, 5) | 70090.92 | 0.03056  | 69157.34 | 0.01863  | 69392.84 | 0.02603  | 68469.17 | -0.00211 |

|                      |          |          |          |          |          |          |          |          |
|----------------------|----------|----------|----------|----------|----------|----------|----------|----------|
| 15(10, 6)- 14( 9, 6) | 70090.92 | -0.00994 | 69157.34 | -0.01106 | 69392.84 | -0.01575 | 68469.17 | -0.03306 |
| 16(10, 7)- 15( 9, 6) | 72497.97 | 0.08037  | 71523.52 | 0.04962  | 71777.6  | 0.15564  | 70814.19 | 0.06622  |
| 16(10, 6)- 15( 9, 7) | 72497.97 | -0.11809 | 71523.52 | -0.09498 | 71777.6  | -0.04925 | 70814.19 | -0.08464 |
| 16(10, 6)- 15( 9, 6) | 72497.97 | 0.05976  | 71523.52 | 0.03506  | 71777.6  | 0.13426  | 70814.19 | 0.05095  |
| 16(10, 7)- 15( 9, 7) | 72497.97 | -0.09747 | 71523.52 | -0.08043 | 71777.6  | -0.02787 | 70814.19 | -0.06937 |
| 17(10, 8)- 16( 9, 7) |          |          | 73880.49 | 0.05236  | 74152.03 | -0.01438 |          |          |
| 17(10, 7)- 16( 9, 7) |          |          | 73880.49 | -0.00274 | 74152.03 | -0.09515 |          |          |
| 17(10, 7)- 16( 9, 8) |          |          | 73880.91 | -0.03696 | 74152.76 | -0.0049  |          |          |
| 17(10, 8)- 16( 9, 8) |          |          | 73880.91 | 0.01814  | 74152.76 | 0.07587  |          |          |
| 11(11, 1)- 10(10, 0) | 63949.33 | 0.02238  | 63152.55 | 0.02763  | 63302.69 | 0.0918   | 62510.13 | 0.07111  |
| 11(11, 0)- 10(10, 1) | 63949.33 | 0.02238  | 63152.55 | 0.02763  | 63302.69 | 0.0918   | 62510.13 | 0.07111  |
| 11(11, 0)- 10(10, 0) | 63949.33 | 0.02238  | 63152.55 | 0.02763  | 63302.69 | 0.0918   | 62510.13 | 0.07111  |
| 11(11, 1)- 10(10, 1) | 63949.33 | 0.02238  | 63152.55 | 0.02763  | 63302.69 | 0.0918   | 62510.13 | 0.07111  |
| 12(11, 2)- 11(10, 1) | 66378.19 | -0.02269 | 65538.86 | 0.00185  | 65709.1  | -0.01966 | 64875.22 | -0.00809 |
| 12(11, 1)- 11(10, 2) | 66378.19 | -0.02269 | 65538.86 | 0.00185  | 65709.1  | -0.01966 | 64875.22 | -0.00809 |
| 12(11, 1)- 11(10, 1) | 66378.19 | -0.02269 | 65538.86 | 0.00185  | 65709.1  | -0.01966 | 64875.22 | -0.00809 |
| 12(11, 2)- 11(10, 2) | 66378.19 | -0.02269 | 65538.86 | 0.00185  | 65709.1  | -0.01966 | 64875.22 | -0.00809 |
| 13(11, 3)- 12(10, 2) | 68805.87 | -0.02252 | 67924.03 | -0.02986 | 68114.42 | 0.00279  | 67239.26 | -0.00212 |
| 13(11, 2)- 12(10, 3) | 68805.87 | -0.02254 | 67924.03 | -0.02988 | 68114.42 | 0.00276  | 67239.26 | -0.00214 |
| 13(11, 2)- 12(10, 2) | 68805.87 | -0.02252 | 67924.03 | -0.02986 | 68114.42 | 0.00279  | 67239.26 | -0.00212 |
| 13(11, 3)- 12(10, 3) | 68805.87 | -0.02254 | 67924.03 | -0.02988 | 68114.42 | 0.00277  | 67239.26 | -0.00213 |
| 14(11, 4)- 13(10, 3) | 71231.40 | -0.01532 | 70307.29 | 0.02293  | 70517.56 | 0        | 69601.29 | -0.00957 |
| 14(11, 3)- 13(10, 4) | 71231.40 | -0.0155  | 70307.29 | 0.0228   | 70517.56 | -0.00019 | 69601.29 | -0.0097  |
| 14(11, 3)- 13(10, 3) | 71231.40 | -0.01534 | 70307.29 | 0.02292  | 70517.56 | -0.00001 | 69601.29 | -0.00958 |
| 14(11, 4)- 13(10, 4) | 71231.40 | -0.01549 | 70307.29 | 0.02281  | 70517.56 | -0.00017 | 69601.29 | -0.00969 |
| 15(11, 5)- 14(10, 4) | 73653.69 | -0.00961 | 72687.47 | -0.01254 | 72917.48 | 0.01266  | 71960.31 | -0.03178 |
| 15(11, 4)- 14(10, 5) | 73653.69 | -0.01068 | 72687.47 | -0.01329 | 72917.48 | 0.01155  | 71960.31 | -0.03257 |
| 15(11, 4)- 14(10, 4) | 73653.69 | -0.0097  | 72687.47 | -0.0126  | 72917.48 | 0.01257  | 71960.31 | -0.03184 |
| 15(11, 5)- 14(10, 5) | 73653.69 | -0.01059 | 72687.47 | -0.01323 | 72917.48 | 0.01164  | 71960.31 | -0.0325  |
| 16(11, 6)- 15(10, 5) |          |          |          |          |          |          | 74315.23 | -0.00959 |
| 16(11, 5)- 15(10, 6) |          |          |          |          |          |          | 74315.23 | -0.01353 |
| 16(11, 5)- 15(10, 5) |          |          |          |          |          |          | 74315.23 | -0.00995 |
| 16(11, 6)- 15(10, 6) |          |          |          |          |          |          | 74315.23 | -0.01317 |
| 12(12, 1)- 11(11, 0) | 69923.31 | 0.00436  | 69052.63 | -0.03368 | 69216.09 | 0.01925  | 68350.03 | 0.00887  |
| 12(12, 0)- 11(11, 1) | 69923.31 | 0.00436  | 69052.63 | -0.03368 | 69216.09 | 0.01925  | 68350.03 | 0.00887  |
| 12(12, 1)- 11(11, 1) | 69923.31 | 0.00436  | 69052.63 | -0.03368 | 69216.09 | 0.01925  | 68350.03 | 0.00887  |
| 12(12, 0)- 11(11, 0) | 69923.31 | 0.00436  | 69052.63 | -0.03368 | 69216.09 | 0.01925  | 68350.03 | 0.00887  |
| 13(12, 2)- 12(11, 1) | 72352.30 | 0.02257  | 71439.10 | 0.04109  | 71622.63 | -0.02882 | 70715.27 | 0.02013  |
| 13(12, 1)- 12(11, 2) | 72352.30 | 0.02257  | 71439.10 | 0.04109  | 71622.63 | -0.02882 | 70715.27 | 0.02013  |
| 13(12, 2)- 12(11, 2) | 72352.30 | 0.02257  | 71439.10 | 0.04109  | 71622.63 | -0.02882 | 70715.27 | 0.02013  |
| 13(12, 1)- 12(11, 1) | 72352.30 | 0.02257  | 71439.10 | 0.04109  | 71622.63 | -0.02882 | 70715.27 | 0.02013  |
| 14(12, 3)- 13(11, 2) |          |          | 73824.52 | -0.00324 | 74028.23 | -0.01279 | 73079.50 | -0.04683 |
| 14(12, 2)- 13(11, 3) |          |          | 73824.52 | -0.00324 | 74028.23 | -0.01279 | 73079.50 | -0.04683 |



|                      |          |          |          |          |          |          |          |          |
|----------------------|----------|----------|----------|----------|----------|----------|----------|----------|
| 14(12, 3)- 13(11, 3) |          |          | 73824.52 | -0.00324 | 74028.23 | -0.01279 | 73079.50 | -0.04683 |
| 14(12, 2)- 13(11, 2) |          |          | 73824.52 | -0.00324 | 74028.23 | -0.01279 | 73079.50 | -0.04683 |
| 13(13, 1)- 12(12, 0) |          |          |          |          |          |          | 74189.74 | -0.04061 |
| 13(13, 0)- 12(12, 1) |          |          |          |          |          |          | 74189.74 | -0.04061 |
| 13(13, 1)- 12(12, 1) |          |          |          |          |          |          | 74189.74 | -0.04061 |
| 13(13, 0)- 12(12, 0) |          |          |          |          |          |          | 74189.74 | -0.04061 |
| 30( 0,30)- 29( 1,29) | 60850.52 | 0.03859  |          |          |          |          |          |          |
| 30( 1,30)- 29( 0,29) | 60850.52 | 0.03859  |          |          |          |          |          |          |
| 31( 0,31)- 30( 1,30) | 62848.47 | -0.05083 |          |          |          |          |          |          |
| 31( 1,31)- 30( 0,30) | 62848.47 | -0.05083 |          |          |          |          |          |          |
| 29( 1,28)- 28( 2,27) | 60655.21 | 0.01165  |          |          |          |          |          |          |
| 29( 2,28)- 28( 1,27) | 60655.21 | 0.01154  |          |          |          |          |          |          |
| 30( 2,28)- 29( 3,27) | 64461.17 | 0.03336  |          |          |          |          |          |          |
| 30( 3,28)- 29( 2,27) | 64461.17 | 0.03064  |          |          |          |          |          |          |
| 28( 2,26)- 27( 3,25) | 60466.78 | 0.00501  |          |          |          |          |          |          |
| 28( 3,26)- 27( 2,25) | 60466.78 | -0.00959 |          |          |          |          |          |          |
| 29( 2,27)- 28( 3,26) | 62463.90 | -0.01304 |          |          |          |          |          |          |
| 29( 3,27)- 28( 2,26) | 62463.90 | -0.01935 |          |          |          |          |          |          |
